# Supplementary material for: New energetic compounds based on the nitrogen-rich 5,5′-azotetrazolate anion ([C2N10]2−)
Source: Royal Society of Chemistry journal article supplement (doi:10.1039/b820381d), 2009-01-01
Supplement: b820381d.pdf [file b820381d.pdf]

## Supporting Information to Paper:

### New Energetic Compounds Based on the Nitrogen-rich 5,5'-Azotetrazolate Anion ( $[\text{C}_2\text{N}_{10}]^{2-}$ )

Thomas M. Klapötke\* and Carles Miró Sabaté

**Table S1** Crystal structure solution and refinement for 5,5'-azotetrazolate salts **2** and **4**.

| Parameter                                                                            | <b>2</b>                                                      | <b>4</b>                                                      |
|--------------------------------------------------------------------------------------|---------------------------------------------------------------|---------------------------------------------------------------|
| Formula                                                                              | C <sub>8</sub> H <sub>28</sub> N <sub>20</sub> O <sub>6</sub> | C <sub>4</sub> H <sub>16</sub> N <sub>16</sub> O <sub>4</sub> |
| Formula weight [g mol <sup>-1</sup> ]                                                | 500.51                                                        | 352.33                                                        |
| Crystal size                                                                         | 0.17x0.12x0.06                                                | 0.29x0.13x0.07                                                |
| T / K                                                                                | 200(2)                                                        | 100(2)                                                        |
| Crystal system                                                                       | Monoclinic                                                    | Triclinic                                                     |
| Space group                                                                          | <i>P2<sub>1</sub>/n</i>                                       | <i>P</i> -1                                                   |
| <i>a</i> / Å                                                                         | 9.3101(3)                                                     | 4.563(5)                                                      |
| <i>b</i> / Å                                                                         | 6.5383(2)                                                     | 7.362(5)                                                      |
| <i>c</i> / Å                                                                         | 19.5637(5)                                                    | 11.334(5)                                                     |
| $\alpha$ / °                                                                         | 90                                                            | 105.125(5)                                                    |
| $\beta$ / °                                                                          | 90.48(1)                                                      | 90.933(5)                                                     |
| $\gamma$ / °                                                                         | 90                                                            | 102.871(5)                                                    |
| Volume / Å <sup>3</sup>                                                              | 1190.84(6)                                                    | 357.2(5)                                                      |
| <i>Z</i>                                                                             | 2                                                             | 1                                                             |
| $\rho$ (g cm <sup>-3</sup> )                                                         | 1.396                                                         | 1.638                                                         |
| $\lambda$ (Mo K $\alpha$ , Å)                                                        | 0.71073                                                       | 0.71073                                                       |
| $\mu$ (mm <sup>-1</sup> )                                                            | <b>0.169</b>                                                  | 0.140                                                         |
| reflns collected                                                                     | 5078                                                          | 2480                                                          |
| indep. reflns                                                                        | 1861                                                          | 1311                                                          |
| <i>R</i> <sub>int</sub>                                                              | 0.0292                                                        | 0.0193                                                        |
| obsd. reflns.                                                                        | 2709                                                          | 1164                                                          |
| F(000)                                                                               | 528                                                           | 184                                                           |
| GOOF                                                                                 | 1.039                                                         | 1.071                                                         |
| n°. parameters                                                                       | 210                                                           | 141                                                           |
| <i>R</i> <sub>1</sub> / <i>wR</i> <sub>2</sub> [ <i>I</i> > 2 $\sigma$ ( <i>I</i> )] | 0.0459, 0.1199                                                | 0.0530, 0.1323                                                |
| <i>R</i> <sub>1</sub> / <i>wR</i> <sub>2</sub> (all data)                            | 0.0720, 0.1356                                                | 0.0590, 0.1378                                                |

$$R_1 = \sum ||F_o| - |F_c|| / \sum |F_o|; R_w = [\sum (F_o^2 - F_c^2) / \sum w (F_o^2)]^{1/2}; w = [\sigma_c^2 (F_o^2) + (xP)^2 + yP]^{-1}, P = (F_o^2 - 2F_c^2) / 3.$$

**Table S2** Primary level (diagonal) and secondary level (off-diagonal) graph-sets found in the crystal structure of compound **2**.

|                                | A       | B       | C       | D                      | E                    | F                     | G       | H                     |
|--------------------------------|---------|---------|---------|------------------------|----------------------|-----------------------|---------|-----------------------|
| O2–H22•••O3 <sup>iv</sup> (A)  | D1,1(2) |         |         |                        |                      |                       |         |                       |
| O1–H12•••O2 (B)                | D2,2(4) | D1,1(2) |         |                        |                      |                       |         |                       |
| O1–H11•••O2 <sup>ii</sup> (C)  | D2,2(4) | C1,2(4) | D1,1(2) |                        |                      |                       |         |                       |
| O3–H32•••N6 (D)                | D2,2(4) | –       | –       | D1,1(2)<br>[D2,2(8)]   |                      |                       |         |                       |
| O2–H21•••N9 (E)                | D2,2(5) | D2,2(4) | D2,2(4) | D2,2(5)<br>[D2,2(8)]   | D1,1(2)<br>[D2,2(8)] |                       |         |                       |
| O3–H31•••N7 <sup>iii</sup> (F) | D2,2(4) | –       | –       | R4,4(10)<br>[C2,2(10)] | D2,2(5)<br>[D2,2(9)] | D1,1(2)<br>[D2,2(10)] |         |                       |
| N1–H1B•••O1 <sup>ii</sup> (G)  | –       | D2,2(4) | D2,2(4) | –                      | –                    | –                     | D1,1(2) |                       |
| N1–H1A•••N8 <sup>i</sup> (H)   | –       | –       | –       | D2,2(5)<br>[D2,2(9)]   | D2,2(4)<br>[D2,2(9)] | D2,2(4)<br>[D2,2(10)] | D2,2(5) | D1,1(2)<br>[D2,2(10)] |

Symmetry codes: (i) 0.5–x, –0.5+y, 0.5–z; (ii) 1.5–x, –0.5+y, 0.5–z; (iii) –x, 1–y, 1–z; (iv) 1–x, 1–y, 1–z.

**Table S3** Primary level (diagonal) and secondary level (off-diagonal) graph-sets found in the crystal structure of compound **4**.

|                                | A        | B                     | C        | D                     | E        | F                      | G                     | H                     | I                    |
|--------------------------------|----------|-----------------------|----------|-----------------------|----------|------------------------|-----------------------|-----------------------|----------------------|
| O2–H2A•••O1 <sup>vi</sup> (A)  | D1,1(2)  |                       |          |                       |          |                        |                       |                       |                      |
| O2–H2B•••N3 <sup>iv</sup> (B)  | D2,2(5)  | D1,1(2)<br>[D2,2(10)] |          |                       |          |                        |                       |                       |                      |
| N8–H8B•••O2 (C)                | R4,4(14) | D2,2(4)               | D1,1(2)  |                       |          |                        |                       |                       |                      |
| N8–H8A•••O1 <sup>v</sup> (D)   | D2,3(8)  | –                     | D3,3(10) | C1,1(5)               |          |                        |                       |                       |                      |
| N8–H8A•••O1 <sup>iv</sup> (E)  | D2,3(8)  | –                     | D3,3(10) | R4,4(20)<br>[R2,2(4)] | R2,2(10) |                        |                       |                       |                      |
| N6–H6B•••N1 <sup>i</sup> (F)   | D2,2(6)  | D2,2(5)<br>[D2,2(9)]  | D2,2(8)  | C3,3(16)              | C3,3(16) | D1,1(2)<br>[D2,2(8)]   |                       |                       |                      |
| N7–H7•••N5 <sup>ii</sup> (G)   | D2,2(6)  | D2,2(6)<br>[D2,2(7)]  | D2,2(6)  | C3,3(10)              | C3,3(10) | R4,4(16)<br>[R2,2(9)]  | D1,1(2)<br>[D2,2(4)]  |                       |                      |
| N6–H6A•••N2 <sup>iii</sup> (H) | D2,2(6)  | D2,2(4)<br>[D2,2(10)] | D2,2(8)  | C3,3(18)              | C3,3(18) | R4,4(10)<br>[C2,2(10)] | C2,2(9)<br>[R4,4(20)] | D1,1(2)<br>[D2,2(10)] |                      |
| N8–H8C•••N4 <sup>ii</sup> (I)  | D2,2(7)  | D2,2(4)<br>[D2,2(9)]  | D2,2(5)  | C3,3(14)              | C3,3(14) | R4,4(18)<br>[R2,2(12)] | R2,2(7)<br>[R4,4(16)] | C2,2(9)<br>[R4,4(26)] | D1,1(2)<br>[D2,2(8)] |

Symmetry codes: (i) 1–x, –y, 1–z; (ii) –1+x, –1+y, z; (iii) 1+x, y, z; (iv) 1–x, –y, 2–z; (v) –1+x, y, z; (vi) 2–x, –y, 2–z.

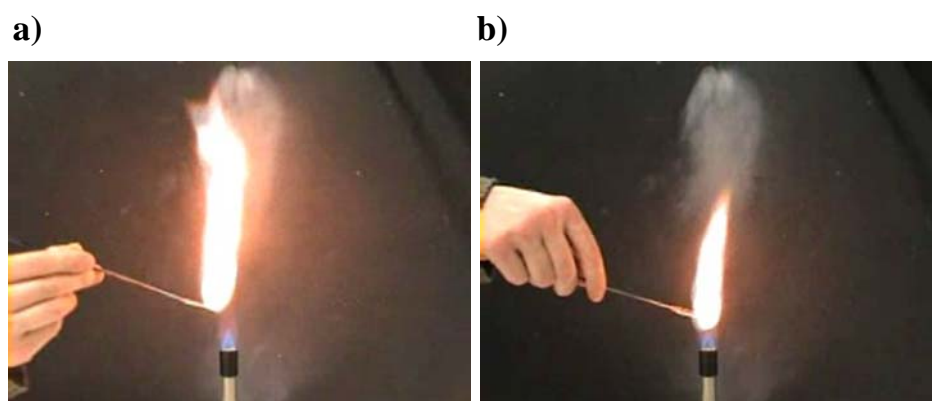

**Figure S1** Smokeless deflagration in the “flame test” for 5,5′-azotetrazolate salts **1** (a) and **2** (b).

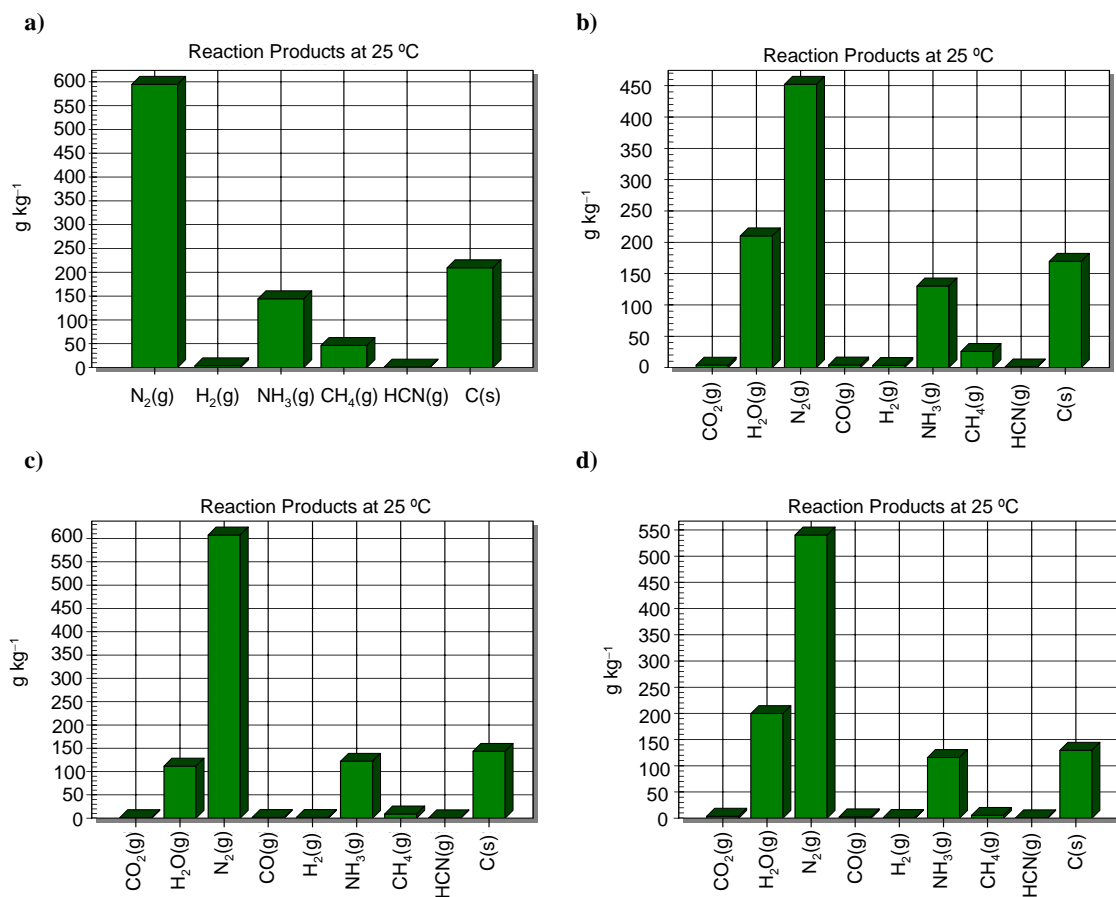

**Figure S2** Predicted decomposition gases (computed using the ICT code) of 5,5'-azotetrazolate salts a) **1**, b) **2**, c) **3** and d) **4**.
